# Supplementary figures and images for: Midbrain dopamine neurons compute inferred and cached value prediction errors in a common framework
Source: eLife journal article supplement (doi:10.7554/elife.13665), 2016-03-07

**A** phasic wide waveform neuron

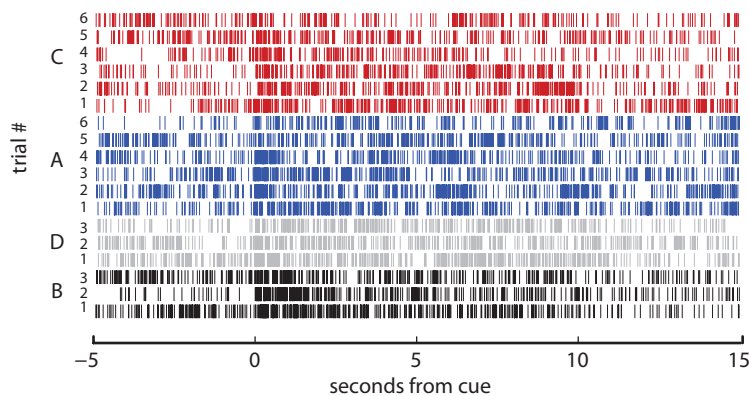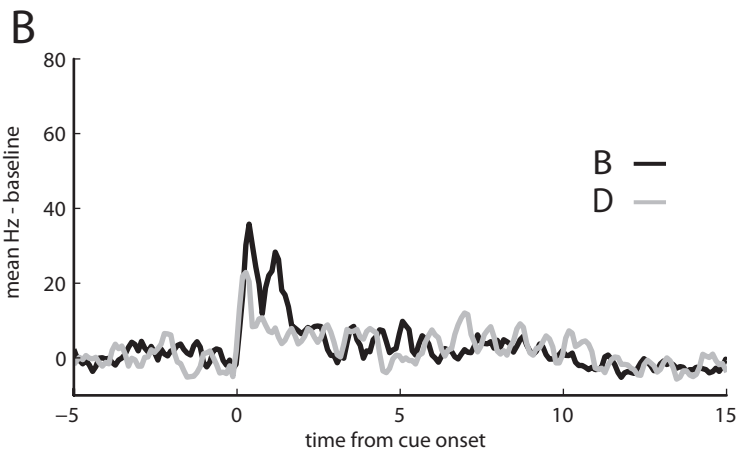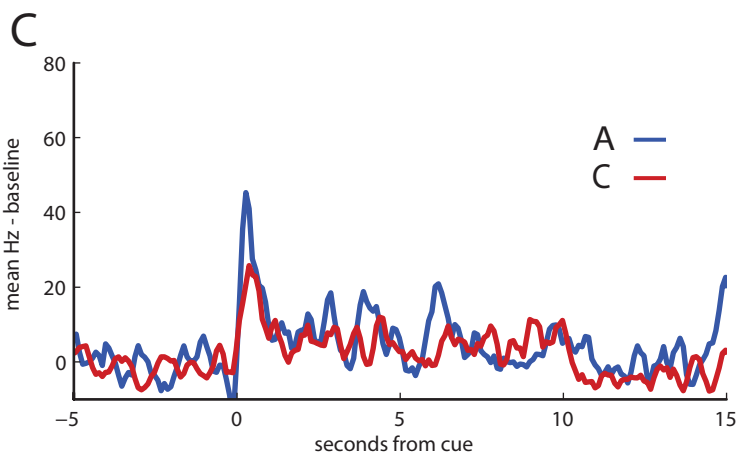

**D** tonic wide waveform neuron

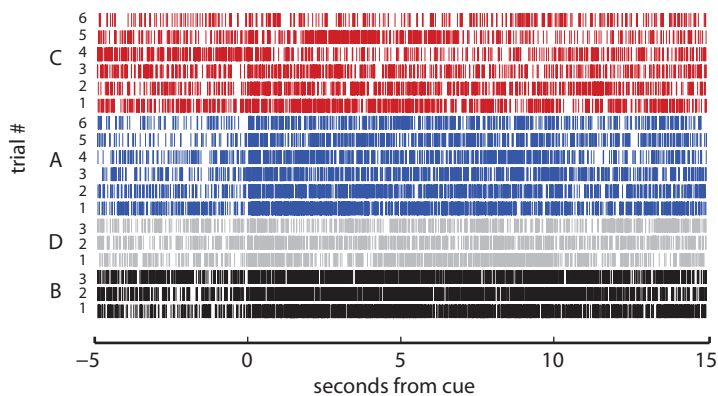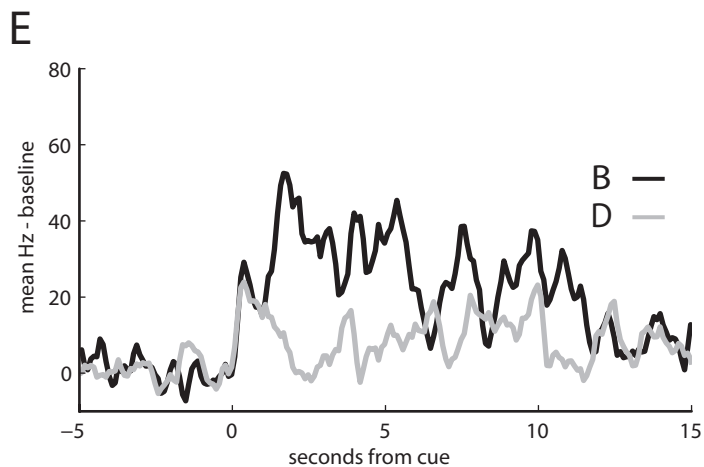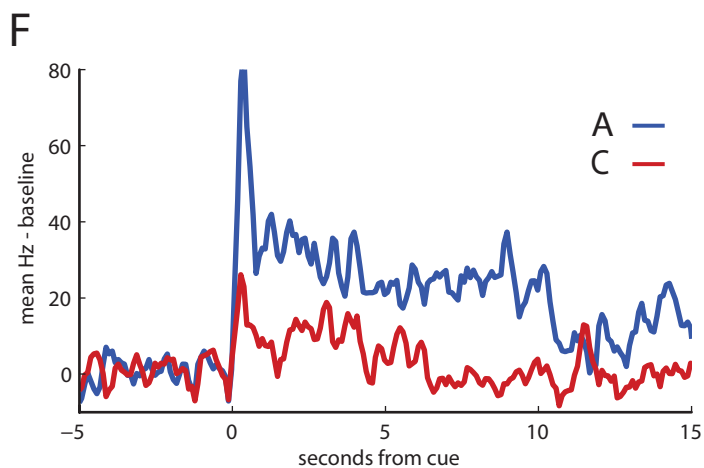

Supplement: supp [file elife_poa_e13665_Figure_3_figure_supplement_1.pdf › elife_poa_e13665_Figure_3_figure_supplement_1.pdf]

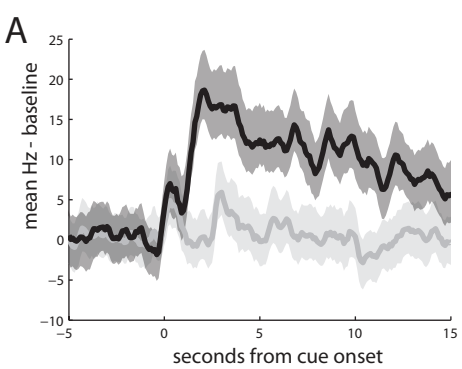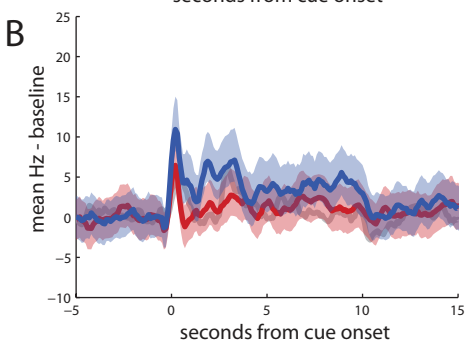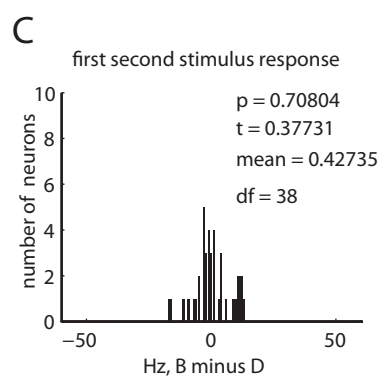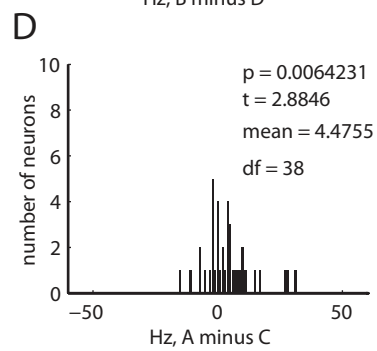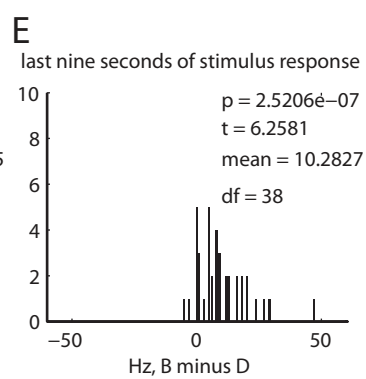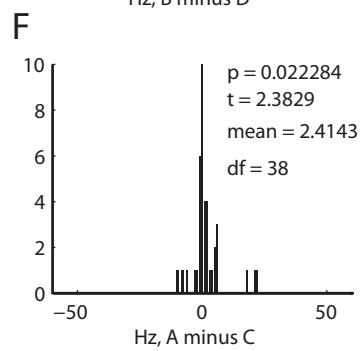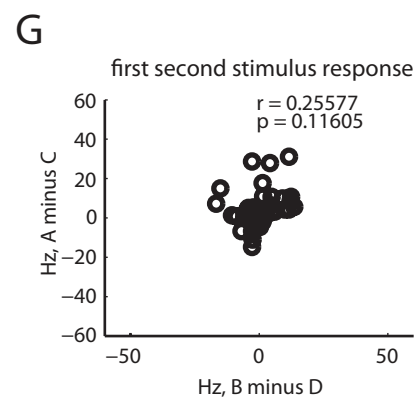

Supplement: supp [file elife_poa_e13665_Figure_3_figure_supplement_2.pdf › elife_poa_e13665_Figure_3_figure_supplement_2.pdf]

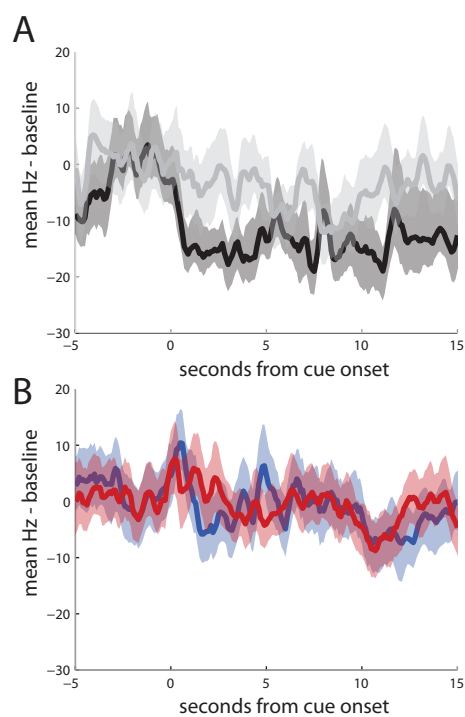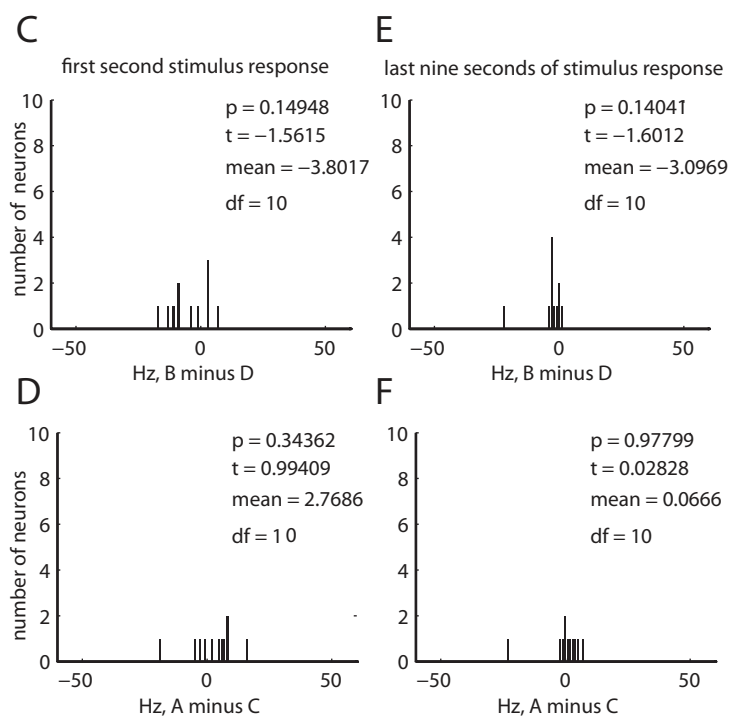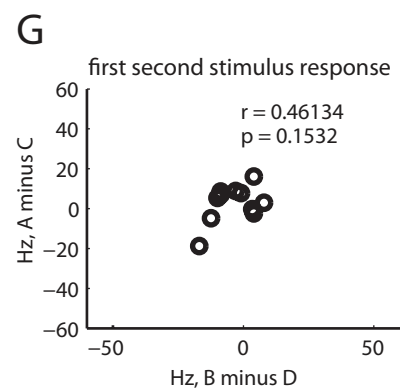

Supplement: supp [file elife_poa_e13665_Figure_3_figure_supplement_3.pdf › elife_poa_e13665_Figure_3_figure_supplement_3.pdf]
